# Supplementary material for: Pickering emulsion technology based on the concept of “the combination of medicine and adjuvant” to enhance the oxidation stability of volatile oils in solid preparations—taking Lingzhu Pulvis as an example
Source: RSC Adv. 2022 Sep 27;12(42):27453–62. doi: 10.1039/d2ra04433a (PMC9513534; doi:10.1039/d2ra04433a)
Supplement: RA-012-D2RA04433A-s001 [file RA-012-D2RA04433A-s001.xlsx]

## Sheet: Sheet1
CAS	oil-water mixture group 1（5mg/ml）	oil-water mixture group 2（5mg/ml）	oil-water mixture group 3（5mg/ml）	crude oil group 1（5mg/ml）	crude oil group 2（5mg/ml）	crude oil group 3（5mg/ml）	Pickering emulsion group 1（5mg/ml）	Pickering emulsion group 2（5mg/ml）	Pickering emulsion group 3（5mg/ml）	oil-water mixture group 1（10mg/ml）	oil-water mixture group 2（10mg/ml）	oil-water mixture group 3（10mg/ml）	crude oil group 1（10mg/ml）	crude oil group 2（10mg/ml）	crude oil group 3（10mg/ml）	Pickering emulsion group 1（10mg/ml）	Pickering emulsion group 2（10mg/ml）	Pickering emulsion group 3（10mg/ml）	oil-water mixture group 1（15mg/ml）	oil-water mixture group 2（15mg/ml）	oil-water mixture group 3（15mg/ml）	crude oil group 1（15mg/ml）	crude oil group 2（15mg/ml）	crude oil group 3（15mg/ml）	Pickering emulsion group 1（15mg/ml）	Pickering emulsion group 2（15mg/ml）	Pickering emulsion group 3（15mg/ml）
053771-88-3	0.0812	0.0468	0.0768	0	0	0	0.1014	0.1021	0.0968	0.0817	0.0619	0.0737	0.1032	0.1179	0.1208	0	0	0	0.0732	0.0895	0.0871	0.0828	0.0885	0.0858	0	0	0
007785-26-4	0.3102	0.2932	0.3201	0	0	0	0	0	0	0	0	0	0	0	0	0	0	0	0	0	0	0	0	0	0	0	0
010281-56-8	0.0617	0.0627	0.0619	0.05505	0.0512	0.0589	0.067	0.0673	0.0666	0.0595	0.0564	0.0634	0.075	0.0699	0.0708	0.0676	0.0675	0.0631	0.0609	0.0581	0.0587	0.0694	0.0665	0.0948	0.0637	0.0638	0.0619
000079-92-5	0	0	0	0.0896	0.0894	0.0959	0	0	0	0.06135	0.0385	0.0842	0	0	0	0	0	0	0	0	0	0.0984	0.1099	0.1214	0.0822	0.08165	0.0811
997051-78-3	0.2838	0.2756	0.2827	0.2594	0.2594	0.2594	0.2925	0.2913	0.2876	0.2622	0.2416	0.2694	0.3261	0.3119	0.3125	0.2893	0.2875	0.2733	0.2583	0.2524	0.2597	0.2999	0.2871	0.3385	0.2705	0.2714	0.2661
006983-03-5	0.0951	0.0893	0.0931	0.2028	0.0845	0.0933	0.098	0.0968	0.0956	0.0881	0.0806	0.0899	0.1077	0.10545	0.1032	0.0951	0.0948	0.0893	0.0853	0.0823	0.0836	0.0977	0.0923	0.1387	0.0882	0.0875	0.08785
006876-13-7	1.167	1.152	1.1595	0	0	0	0	0	0	0	0	0	1.2415	1.2464	1.2513	1.1625	1.1485	1.1555	0	0	0	1.1474	1.14775	1.1481	0	0	0
003387-41-5	0.3312	0.31845	0.3057	0.1881	0.2958	0.2888	0	0	0	0.3211	0.2813	0.338	0.37155	0.3713	0.3718	0.3336	0.3293	0.3224	0.3143	0.3143	0.3326	0	0	0	0.3058	0.3067	0.3076
020536-40-7	0	0	0	0.6789	1.4063	1.0426	0	0	0	0	0	0	0	0	0	0	0	0	0	0	0	0	0	0	0	0	0
000473-55-2	0.8425	0.8408	1.1482	0.6007	0.7896	1.0162	1.1889	1.1793	1.1543	1.0771	0.973	0.7959	0.8849	1.2568	0.8925	0.8302	0.8194	1.1228	1.0072	0.7449	1.0768	0.8162	1.1292	0.8193	0.7678	1.0727	1.0877
001124-25-0	0.1573	1.32125	2.4852	1.33835	2.5286	0.1481	2.5852	0.0984	2.4647	2.5169	2.2127	2.5289	2.4729	0.1021	2.7012	2.508	2.4157	2.4784	2.1369	2.3498	2.498	2.3186	0.0308	2.3675	2.2	2.2119	2.3422
000110-93-0	0.1878	0.1676	0.1638	0.2031	0.2015	0.2047	0.278	0.2616	0.2705	0.198	0.1913	0.1948	0.2188	0.204	0.2065	0.2437	0.2443	0.2294	0.1872	0.1696	0.177	0.1976	0.1884	0.2423	0.2289	0.2243	0.2097
000123-35-3	0.1902	0.1814	0.18	0.1765	0.1553	0.1645	0.1675	0.1622	0.1647	0.1883	0.1839	0.1959	0.1918	0.1823	0.1889	0.1654	0.1674	0.1593	0.1907	0.1803	0.1856	0.1883	0.2104	0.2325	0.1604	0.1592	0.1524
997051-78-2	1.5677	1.5595	1.4532	1.4519	1.5189	1.3849	1.5125	1.5012	1.4559	1.4563	1.3194	1.4684	1.5175	1.5739	1.5702	1.4717	1.4352	1.4463	1.3058	1.3766	1.4407	1.4143	1.4119	1.437	1.3437	1.3422	1.3792
013466-78-9	0.0995	0.0172	0.05835	0.10175	0.086	0.1175	0.0991	0.0982	0.016	0	0	0	0.1009	0.0872	0.0931	0.0854	0.0818	0.0782	0	0	0	0.0847	0.075	0.07985	0.0754	0.07225	0.0691
000470-67-7	0.1476	0.13705	0.1265	0.14735	0.1223	0.1724	0.1353	0.1324	0.1311	0.1426	0.1482	0.1382	0.1487	0.1306	0.141	0.1211	0.1223	0.1137	0.1444	0.1341	0.14	0.1453	0.1325	0.2823	0.1113	0.1081	0.1024
015193-25-6	0.3273	0.3417	0.3196	0.9971	0.2875	0.3098	0.3421	0.346	0.3397	0.351	0.3489	0.3525	0.3692	0.3486	0.3563	0.3471	0.3456	0.3372	0.3469	0.3388	0.3426	0.3519	0.3362	0.4231	0.3427	0.3336	0.3264
000099-87-6	0.2613	0.275	0.2643	0.2041	0.2227	0.2394	0.2428	0.2448	0.2399	0.2729	0.2715	0.2694	0.2799	0.2649	0.2677	0.24	0.2384	0.2326	0.2533	0.2474	0.2434	0.2504	0.2393	0.3101	0.2356	0.2277	0.2211
005989-27-5	2.4878	2.5018	2.3186	1.2002	2.3245	2.1016	2.431	2.3921	2.3404	2.4994	2.262	2.5045	2.3818	2.5847	2.5793	2.4054	2.3324	2.4078	2.1525	2.352	2.4606	2.2615	2.2935	2.2731	2.1691	2.1666	2.2702
000470-82-6	0.5741	0.542	0.5176	0.4958	0.567	0.5385	0.4976	0.4838	0.4642	0.4999	0.4736	0.4729	0.5083	0.4985	0.497	0.4037	0.3961	0.3748	0.4178	0.4145	0.4255	0.4352	0.4209	0.5246	0.3411	0.334	0.3306
006874-10-8	0	0	0	0	0	0	0.0861	0.0814	0.0769	0.0647	0.0776	0.0656	0.0754	0.0562	0.0687	0.0655	0.0653	0.0534	0.0615	0.0632	0.0596	0.0675	0.0526	0.2606	0.0571	0.0629	0.0524
003338-55-4	0	0	0	0	0	0	0.02585	0.0178	0.0339	0	0	0	0	0	0	0	0	0	0	0	0	0	0	0	0	0	0
000099-85-4	0.0763	0.1147	0.0569	0.11	0.0511	0.1689	0.0717	0.0645	0.0637	0.0592	0.0851	0.0565	0.0592	0.0514	0.0567	0.0587	0.0559	0.046	0.0602	0.054	0.0585	0.0617	0.0518	0.3545	0.0509	0.0499	0.0439
000629-92-5	0.0662	0.0569	0.0476	0.0737	0.0395	0.1865	0	0	0	0	0	0	0	0	0	0	0	0	0	0	0	0	0	0	0	0	0
000586-62-9	0.4367	0.2969	0.2596	0.5324	0.3865	0.6783	0.3009	0.241	0.2194	0.2072	0.219	0.1908	0.2064	0.2182	0.2019	0.1858	0.1833	0.1615	0.1891	0.183	0.182	0.1935	0.3029	0.5724	0.1679	0.163	0.1573
000078-70-6	0.7061	0.5906	0.6907	0.60165	0.4387	0.7646	0.5021	0.5264	0.4776	0.4494	0.4946	0.4503	0.4258	0.4153	0.4104	0.4561	0.4651	0.4213	0.4297	0.4292	0.3963	0.4105	0.5297	0.703	0.46	0.4494	0.4318
000112-95-8	0.052	0.0988	0.0294	1.0543	0.1046	0.3244	0.0517	0.0339	0.0326	0.047	0.0412	0.0216	0.0339	0.0322	0.0395	0	0	0	0	0	0	0	0	0	0.0188	0.0174	0.0181
001632-73-1	0.2745	0.2028	0.2098	0.2726	0.1703	0.3749	0.2298	0.24	0.2102	0.1986	0.2112	0.1848	0.2265	0.2	0.1983	0.1997	0.1961	0.1804	0.1862	0.1875	0.1706	0.1952	0.3725	0.5147	0.1944	0.1876	0.181
000586-82-3	0.2346	0.1916	0.192	0.24325	0.1525	0.334	0.2098	0.2055	0.1997	0.1961	0.2083	0.1843	0.1995	0.1963	0.1919	0.1971	0.194	0.1836	0.1895	0.1909	0.1715	0.1933	0.3769	0.4445	0.1959	0.1902	0.1834
997157-73-4	0	0	0	0.5865	0.5372	0.0666	0	0	0	0	0	0	0	0	0	0	0	0	0	0	0	0	0	0	0	0	0
000106-23-0	3.411	0.1232	3.4726	0	0	0	4.0574	3.7032	3.6052	3.199	2.7448	3.5101	3.847	3.953	3.9108	3.5292	3.3243	3.5966	2.9804	3.3565	3.5478	3.673	3.827	3.6706	3.1156	2.9259	3.2453
002385-77-5	0.4095	0.8725	2.032	0	0	0	0	0	0	0	0	0	0	0	0	0	0	0	0	0	0	0	0	0	0	0	0
018675-33-7	0	0	0	0	0	0	0.2707	0.2521	0.2558	0.2256	0.2764	0.217	0	0	0	0.2397	0.2404	0.24005	0	0	0	0	0	0	0	0	0
000507-70-0	0.6376	0.6763	0.715	0	0	0	0	0	0	0	0	0	0	0	0	0.3836	0.378	0.3676	0.3637	0.4018	0.3357	0.359	0.7367	0.54785	0.4138	0.4121	0.41295
000562-74-3	0.3844	0.5275	0.4155	0.3091	0.2167	0.4015	0.3256	0.3185	0.32205	0.3188	0.3866	0.3527	0.3355	0.3237	0.2894	0.3074	0.3062	0.3068	0.3073	0.3167	0.312	0.3239	0.42855	0.5332	0.3063	0.299	0.2893
055722-59-3	0.4711	0.4411	0.4111	0.4725	0.3401	0.6049	0.2505	0.219	0.2077	0.2015	0.2343	0.1724	0.2334	0.2953	0.2139	0.1503	0.1461	0.1309	0.1683	0.1638	0.1407	0.1942	0.3565	0.3923	0.1273	0.1189	0.1112
000098-55-5	5.8934	5.7355	5.81445	0	0	0	5.61505	5.6496	5.5805	0	0	0	5.2549	5.692	5.6168	0	0	0	5.0239	5.4912	5.4011	0	0	0	0	0	0
000586-81-2	1.1962	1.2285	1.0652	1.4789	0.9216	1.2054	0	0	0	1.013	0.98515	0.9573	0	0	0	1.079	1.0558	1.0481	0.98995	1.0177	0.9622	1.0021	1.2444	1.2654	1.0046	1.0047	1.0045
000106-22-9	2.2628	2.14525	2.0277	0	0	0	2.1643	2.1585	2.1359	2.1234	1.9439	2.0829	2.039	2.0173	2.0173	2.1897	2.1489	2.1619	2.106	2.1783	2.0631	2.0573	2.1402	2.1277	2.1635	2.0983	2.141
000106-26-3	3.682	0.0452	2.9896	2.015	3.1787	3.3739	3.3956	3.4937	3.3478	0.0219	3.4379	3.7005	3.5649	3.7317	3.7331	3.2504	2.9868	3.2045	3.6043	3.8779	3.8025	3.6801	3.7293	3.6571	2.9021	0.0152	2.9331
000106-24-1	3.4758	3.2077	3.2613	3.11025	2.9431	3.2774	3.6776	3.6631	3.6454	3.5938	3.2685	3.5531	3.5042	3.4618	3.456	3.7741	3.7183	3.7371	3.5953	3.7482	3.5678	3.5814	3.4713	3.4056	3.7399	3.7091	3.7203
000141-27-5	4.9093	4.2033	4.5563	0	0	0	4.7516	4.7382	4.7449	0	0	0	0	0	0	0	0	0	4.6667	4.942	4.8913	4.7134	4.5927	4.399	4.0593	3.7761	4.1652
000629-50-5	0.2786	0.3374	0.1615	3.0893	0.4821	0.7901	0.1404	0.11	0.1231	0	0	0	0.0555	0.0698	0.0599	0	0	0	0	0	0	0	0	0	0	0	0
997722-71-5	0	0	0	0.1312	0.1239	0.1385	0	0	0	0	0	0	0	0	0	0	0	0	0	0	0	0	0	0	0	0	0
002792-39-4	1.1045	0.7292	0.91685	1.4991	1.6663	1.3319	0.5928	0.6193	0.6265	0	0	0	0.6495	0.6214	0.6314	0.6372	0.6264	0.6271	0	0	0	0.658	0.6227	0.5824	0.6642	0.6592	0.6362
000097-53-0	0.2061	0.19695	0.1878	0	0	0	0.1147	0.1275	0.1471	0.1705	0.1654	0.1442	0.1736	0.1578	0.1591	0.113	0.1053	0.1079	0.1592	0.1628	0.1629	0.1806	0.1673	0.156	0.104	0.1034	0.0989
000141-12-8	0	0	0	0	0	0	0	0	0	0	0	0	0	0	0	0	0	0	0	0	0	0	0	0	0.81135	0.8228	0.7999
000515-13-9	0.4529	0.4461	0.4769	0.8393	0.707	0.8173	0.4878	0.4971	0.509	0.4788	0.4976	0.4747	0.4801	0.4611	0.4448	0.4878	0.5038	0.4921	0.5085	0.4795	0.4741	0.4606	0.4338	0.4059	0.5193	0.5175	0.4984
000475-20-7	0.326	0.3527	0.3151	0	0	0	0.3074	0.298	0.2972	0.2671	0.2684	0.246	0.2793	0.2762	0.2473	0.2475	0.2597	0.2554	0.255	0.2398	0.2382	0.2297	0.2105	0.2075	0.2613	0.259	0.2515
013567-54-9	0	0	0	0	0	0	0.6271	0.0469	0.0481	0.0499	0.0563	0.0521	0.0526	0.05155	0.0505	0.0538	0.0558	0.0525	0.0586	0.054	0.0532	0.0573	0.0514	0.0492	0.0597	0.0607	0.0595
000546-28-1	0.9473	1.1301	1.0871	0	0	0	1.0765	1.0908	1.0939	1.0626	1.1144	1.0235	1.0764	1.0351	0.9709	1.0445	1.1106	1.0912	1.1149	1.0608	1.0599	1.0449	1.0215	0.0181	1.137	1.1352	1.1108
094535-52-1	0	0	0	0	0	0	0	0	0	0.6819	0.6954	0.6684	0.684	0.8113	0.656	0	0	0	0.7016	0.6573	0.6706	0.6894	0.6473	0.6082	0.7131	0.7183	0.6989
006753-98-6	0.3946	0.4202	0.4134	0	0	0	0.4034	0.408	0.4105	0.3985	0.4293	0.4029	0.4128	0.3888	0.39	0.4087	0.423	0.4105	0.4333	0.4013	0.4009	0.4176	0.387	0.3624	0.4399	0.4323	0.4247
035944-22-0	0.7784	0.8245	0.6649	0.81545	0.7	0.9309	0	0	0	0	0	0	0	0	0	0	0	0	0	0	0	0	0	0	0	0	0
729602-94-2	1.0968	1.1403	1.1838	1.2138	0.7942	1.004	0	0	0	0	0	0	0	0	0	0	0	0	0	0	0	1.0588	1.0927	1.0249	0.0218	0.60385	1.1859
030021-74-0	2.4853	2.7285	1.6147	1.5809	2.2037	2.2908	1.4851	2.7696	1.4751	1.4763	1.514	1.5125	1.5268	2.6994	1.4369	1.4908	0.313	1.5459	1.5334	1.4381	1.447	0.3194	1.366	1.288	1.521	0.3884	1.5496
020085-19-2	1.6435	1.7734	1.695	0.9354	1.452	1.496	1.8222	1.8811	1.8988	1.8992	2.0193	1.9653	1.9077	1.8463	1.8779	1.9963	2.0713	2.035	2.183	2.0763	2.1216	2.1404	2.0167	1.8948	2.1027	2.132	2.092
000644-30-4	4.1767	4.5655	4.7747	2.2367	3.8096	3.6139	4.3964	4.5232	4.4668	4.5384	4.5437	4.5939	4.4654	4.5288	4.5271	4.6279	4.6229	4.6759	4.3986	4.4004	4.4596	4.3832	4.2274	3.9673	4.6315	4.6881	4.7331
000489-29-2	0.2822	0.2088	0.1354	0	0	0	0	0	0	0.0612	0.068	0.2693	0	0	0	0.2794	0.0453	0.2788	0.2079	0.1977	0.0504	0.0502	0.1742	0.1715	0.1254	0.2025	0.0488
015423-57-1	0	0	0	0	0	0	0	0	0	0	0	0	0	0	0	0	0	0	0	0	0	0	0	0	5.5904	5.6517	5.62105
001461-03-6	1.2194	0.9695	0.7196	0.7277	1.2588	0.99325	0	0	0	0	0	0	0	0	0	0	0	0	0	0	0	0	0	0	0	0	0
010208-80-7	2.6813	2.9202	3.0226	1.2698	2.3638	2.2465	0	0	0	2.9668	3.0142	2.9194	0	0	0	0	0	0	3.0151	2.993	2.9709	0	0	0	3.1393	3.13995	3.1406
016982-00-6	3.8965	4.1544	4.4306	2.1841	3.8184	3.3758	3.9833	4.0306	3.9936	3.8984	3.9211	3.7043	3.9317	3.9531	3.9309	3.7446	3.7258	3.7427	3.7663	3.485	3.4946	3.52	3.3607	3.158	3.9635	4.0097	3.7674
000099-86-5	8.8133	0.1711	8.9584	0	0	0	1.1197	1.0925	1.0814	0	0	0	1.0506	1.0547	1.0465	0	0	0	0	0	0	0	0	0	0	0	0
000483-76-1	8.4175	9.0522	9.1457	3.68	7.5743	7.0557	8.9757	9.1401	9.1113	9.0263	9.1712	9.2566	8.923	9.0423	9.0999	9.306	9.4213	9.4731	9.1827	9.1789	0.2532	9.1894	8.8165	8.3055	9.356	9.5232	9.597
021996-77-0	0.7953	0.8582	0.82675	0	0	0	0	0	0	0	0	0	0	0	0	0	0	0	0	0	0	0	0	0	0	0	0
013062-00-5	1.0387	0.5393	0.789	0.88025	0.8714	0.8891	0.5351	0.5133	0.5391	0.477	0.497	0.4862	0.47725	0.4763	0.4782	0.497	0.5069	0.4895	0.4834	0.4678	0.4798	0.4843	0.4466	0.4321	0.4715	0.4855	0.4854
021391-99-1	1.6308	1.7755	1.9384	1.57085	1.6972	1.4445	1.77	1.78235	1.7947	1.716	1.8144	1.7547	1.851	1.7728	1.7826	1.7767	1.7999	1.7556	1.8136	1.7127	1.7074	1.7912	1.6421	1.5658	1.8137	1.8499	1.7775
021657-90-9	0	0	0	0	0	0	0	0	0	0	0	0	0	0	0	1.2844	1.2999	1.29215	0	0	0	0	0	0	0	0	0
158930-41-7	0.605	0.6409	0.737	0.55335	0.5842	0.5225	0.6786	0.6146	0.6731	0.6121	0.6606	0.6228	0.6516	0.6081	0.6104	0.6364	0.6458	0.628	0.6454	0.6203	0.6033	0.6269	0.5339	0.5438	0.6602	0.6672	0.6407
000077-53-2	0.3476	0.3907	0.4966	0	0	0	0.4472	0.459	0.4869	0.4766	0.5086	0.4838	0.4772	0.4461	0.4609	0.5151	0.5211	0.5099	0.5365	0.5131	0.4903	0.5066	0.4686	0.4385	0.5587	0.5662	0.5357
005794-04-7	0.0972	0.0924	0.102	0	0	0	0.0948	0.0929	0.0932	0.0839	0.0764	0.08015	0.1099	0.106	0.10795	0.0875	0.0909	0.0841	0.0797	0.0779	0.0793	0	0	0	0	0	0
000473-19-8	0	0	0	0	0	0	1.4992	1.4826	1.4533	1.3854	1.2391	1.4021	1.58745	1.5893	1.5856	1.4618	1.4349	1.4202	1.35265	1.3217	1.3836	1.4297	1.4239	1.3968	1.3293	1.3367	1.3658
001879-07-8	0.1558	0.1577	0.1539	0	0	0	0.1615	0.1621	0.159	0.1565	0.1491	0.1585	0.1775	0.1675	0.1722	0.1576	0.1587	0.153	0.1517	0.1477	0.1518	0.1643	0.155	0.2002	0.1509	0.1487	0.1447
000498-15-7	0.09365	0.0946	0.0927	0	0	0	0	0	0	0.0866	0.0873	0.0859	0	0	0	0	0	0	0.07505	0.0739	0.0762	0	0	0	0	0	0
000080-56-8	0.0783	0.0842	0.0724	0	0	0	0	0	0	0	0	0	0	0	0	0	0	0	0	0	0	0	0	0	0	0	0
003779-61-1	0.0325	0.0356	0.0294	0	0	0	0.0385	0.0346	0.02165	0.0298	0.0379	0.0307	0	0	0	0.0311	0.0307	0.0309	0.1526	0.0275	0.0302	0.09315	0.0271	0.1592	0.0254	0.0272	0.0236
001632-70-8	0.0192	0.0213	0.0171	0	0	0	0.0244	0.02165	0.0189	0	0	0	0	0	0	0	0	0	0	0	0	0	0	0	0	0	0
007786-67-6	0	0	0	0	0	0	0	0	0	0.0557	0.04925	0.0428	0	0	0	0.0465	0.04345	0.0404	0	0	0	0.0397	0.1744	0.2005	0	0	0
997083-73-1	0.66455	0.8562	0.4729	0	0	0	0	0	0	0	0	0	0	0	0	0	0	0	0	0	0	0	0	0	0	0	0
000138-87-4	0.314	0.3409	0.2871	0	0	0	0	0	0	0	0	0	0	0	0	0	0	0	0	0	0	0	0	0	0	0	0
000464-45-9	0	0	0	0.54095	0.4781	0.6038	0.5058	0.4784	0.4698	0.4491	0.42215	0.3952	0.4358	0.431	0.4256	0	0	0	0	0	0	0	0	0	0	0	0
040607-48-5	0	0	0	1.91655	1.8591	1.974	0	0	0	0	0	0	0	0	0	0	0	0	0	0	0	0	0	0	0	0	0
075697-98-2	0.3026	0.3929	0.2123	0	0	0	0	0	0	0	0	0	0	0	0	0	0	0	0	0	0	0	0	0	0	0	0
000502-47-6	0	0	0	0	0	0	0	0	0	0.1697	0.15765	0.1456	0.2675	0.2201	0.2291	0.0389	0.0311	0.0306	0.0888	0.0827	0.0766	0.2266	0.20835	0.1901	0.0399	0.0369	0.0384
000540-97-6	0	0	0	3.8231	3.1918	1.3804	0	0	0	0	0	0	0.1322	0.1098	0.121	0.0497	0.0272	0.0436	0	0	0	0	0	0	0.0269	0.0429	0.0349
000469-61-4	0.6591	0.6747	0.6435	1.0213	0.9514	0.9798	0.0519	0.6335	0.6239	0.5981	0.6214	0.5721	0.6098	0.593	0.5452	0.5739	0.6058	0.5976	0.6122	0.5769	0.5752	0.5771	0.5529	0.509	0.6213	0.6176	0.6032
000470-40-6	0.0749	0.0761	0.0737	0	0	0	0.0775	0.0791	0.0791	0.074	0.0789	0.0647	0.0784	0.0748	0.0598	0.0671	0.0754	0.0737	0.0776	0.0706	0.071	0.0619	0.0702	0.0533	0.0797	0.0773	0.0755
060410-32-4	0.10235	0.1003	0.1044	0	0	0	0.1027	0.1052	0.10395	0	0	0	0.1071	0.1007	0.1025	0	0	0	0	0	0	0	0	0	0	0	0
001461-02-5	0.2537	0.2593	0.2481	0	0	0	0.2531	0.2431	0.2426	0.2264	0.2363	0.2283	0.2354	0.2296	0.2252	0.2287	0.2344	0.2231	0.238	0.2191	0.2165	0.2301	0.2119	0.2	0.2367	0.2346	0.2267
090457-37-7	0	0	0	0	0	0	1.1327	1.1418	1.1509	1.1318	1.2069	1.16935	1.1162	1.1155	1.1169	1.17485	1.1844	1.1653	1.1944	1.1269	1.1327	0	0	0	0	0	0
005951-67-7	0.1803	0.2099	0.1507	0	0	0	0	0	0	0.2169	0.2215	0.2261	0.2113	0.2137	0.2161	0	0	0	0	0	0	0	0	0	0.0949	0.25	0.17245
000489-40-7	0.29735	0.29	0.3047	0	0	0	0.3026	0.2894	0.0974	0.171	0.2918	0.1822	0.1711	0.0933	0.1594	0.189	0.2027	0.1944	0.2649	0.2608	0.269	0.0948	0.0828	0.1717	0	0	0
020071-49-2	4.7758	4.7437	4.8079	0	0	0	0	0	0	0.2764	5.108	2.6922	0	0	0	0	0	0	0	0	0	0	0	0	0	0	0
029621-78-1	1.18035	1.3145	1.0462	0	0	0	1.3574	1.4064	1.3951	1.334	1.435	1.4384	1.3494	1.3246	1.3391	1.4172	1.5044	1.443	1.6339	1.58	1.626	1.6092	1.5346	1.4311	1.4522	1.5197	1.4588
028400-12-6	0	0	0	0	0	0	8.86635	8.9092	8.8235	8.8807	8.9736	9.0597	9.1684	8.8159	8.8436	9.1509	9.248	9.3254	8.9672	8.9767	9.2241	8.9766	8.6213	8.0929	9.226	9.3715	9.4687
022469-52-9	0	0	0	0	0	0	0	0	0	0.01875	0.021	0.0165	0	0	0	0.0218	0.0191	0.0221	0.0294	0.0167	0.2351	0.0242	0.0228	0.0211	0.0232	0.0229	0.0217
000639-99-6	1.2825	1.1509	1.4141	0	0	0	1.3046	1.31695	1.3293	1.21055	1.2451	1.176	1.18565	1.1777	1.1936	0	0	0	1.2726	1.23025	1.1879	1.09995	1.1076	1.0923	0	0	0
019912-62-0	0.16525	0.131	0.2005	0	0	0	0.1296	0.1351	0.1464	0.1682	0.1804	0.1416	0.1464	0.1348	0.1334	0.1594	0.1635	0.1597	0.1978	0.1894	0.1711	0.1483	0.1439	0.1367	0.1851	0.1854	0.1746
003386-33-2	0.0332	0.0627	0.0037	0	0	0	0	0	0	0	0	0	0	0	0	0	0	0	0	0	0	0	0	0	0	0	0
002867-05-2	0	0	0	0	0	0	0.0133	0.0133	0.0131	0.0097	0.0087	0.0107	0.0152	0.0129	0.014	0.0126	0.0123	0.0113	0	0	0	0.013	0.013	0.0221	0.0107	0.01095	0.0112
004234-93-9	0	0	0	0	0	0	0	0	0	0	0	0	0.0514	0.0506	0.051	0	0	0	0.0345	0.03325	0.032	0.0438	0.2291	0.4144	0.0683	0.0691	0.0592
007785-53-7	0	0	0	3.3871	4.13255	4.878	0	0	0	0	0	0	0	0	0	0	0	0	0	0	0	5.1657	5.438	5.30185	0	0	0
005392-40-5	0	0	0	2.3796	4.2686	4.1539	0	0	0	4.9173	0.0354	4.9017	4.6617	4.8909	4.8694	4.5716	4.2191	4.5071	0	0	0	0.07105	0.031	0.1111	0	0	0
017302-23-7	0	0	0	0.23075	0.1274	0.3341	0	0	0	0	0	0	0	0	0	0	0	0	0	0	0	0	0	0	0	0	0
018951-85-4	0	0	0	0	0	0	0.08205	0.0681	0.096	0	0	0	0	0	0	0	0	0	0	0	0	0	0	0	0	0	0
092471-23-3	0	0	0	0	0	0	0	0	0	1.0437	0.16	0.5377	0	0	0	0	0	0	0.0116	0.8205	0.5969	0.0567	0.0621	0.0513	0	0	0
000105-90-8	0	0	0	0	0	0	0.668	0.6879	0.7075	0	0	0	0.7566	0.7309	0.7323	0	0	0	0	0	0	0	0	0	0	0	0
997221-83-9	0	0	0	0	0	0	0	0	0	0	0	0	0.4178	0.3712	0.3945	0.4241	0.4362	0.412	0.4613	0.4377	0.4141	0	0	0	0	0	0
000515-17-3	0	0	0	0	0	0	1.198	1.2428	1.2876	1.301	1.4311	1.3243	1.2674	1.27355	1.2797	1.3686	1.4102	1.3515	1.4698	1.4081	1.4193	1.4293	1.3721	1.2858	1.507	1.533	1.4335
053585-13-0	0	0	0	0	0	0	0	0	0	1.2336	1.2719	1.2693	1.2496	1.2177	1.2186	1.2535	1.3218	1.2808	1.3559	1.3195	1.311	1.3748	1.2509	1.2152	1.3609	1.3943	1.3368
020129-39-9	0	0	0	0	0	0	0	0	0	0.0497	0.0581	0.0476		0	0	0	0	0	0	0	0	0	0	0	0.0297	0.0323	0.031
000483-78-3	0	0	0	0	0	0	0.0379	0.0373	0.0379	0.0509	0.045	0.0486	0.0458	0.0477	0.0533	0.0406	0.0429	0.0421	0.0402	0.0338	0.037	0.0411	0.0348	0.0379	0.0539	0.045	0.0411
007785-70-8	0	0	0	0.1688	0.22515	0.2815	0.3121	0.30965	0.3072	0.2419	0.2168	0.22935	0.34815	0.3469	0.3494	0.3056	0.3062	0.2806	0.2412	0.24485	0.2485	0.3288	0.3211	0.333	0.2722	0.2857	0.2771
018968-23-5	0	0	0	0.1281	0.137	0.13255	0	0	0	0	0	0	0	0	0	0	0	0	0	0	0	0	0	0	0	0	0
000000-00-0	0	0	0	0	0	0	1.0414	0.9952	0.2469	0	0	0	0	0	0	0	0	0	0.0216	0.0194	0.0172	0	0	0	0	0	0
001120-21-4	0	0	0	1.2731	0.66295	0.0528	0	0	0	0	0	0	0	0	0	0	0	0	0	0	0	0	0	0	0	0	0
000106-25-2	0	0	0	0	0	0	0	0	0	0.05405	0.0639	0.0442	0.0863	0.0256	0.028	0.0252	0.0226	0.0142	0	0	0	0	0	0	0	0	0
997783-22-6	0	0	0	0.868	0.0872	0.4776	0	0	0	0	0	0	0	0	0	0	0	0	0	0	0	0	0	0	0	0	0
000124-18-5	0	0	0	0.477	0.0846	0.2399	0	0	0	0	0	0	0	0	0	0.0419	0.0358	0.03885	0	0	0	0	0	0	0	0	0
997175-06-6	0	0	0	0.4858	0.2793	0.38255	0	0	0	0	0	0	0	0	0	0	0	0	0	0	0	0	0	0	0	0	0
029873-99-2	0	0	0	2.0191	3.6579	2.8385	0	0	0	0	0	0	0	0	0	0	0	0	0	0	0	0	0	0	0	0	0
099529-78-9	0	0	0	4.1241	8.0391	6.9714	0	0	0	0	0	0	0	0	0	0	0	0	0	0	0	0	0	0	0	0	0
000489-39-4	0	0	0	0.319	0.703	0.511	0.17485	0.1312	0.2185	0	0	0	0	0	0	0	0	0	0	0	0	0	0	0	0	0	0
050277-34-4	0	0	0	0	0	0	0	0	0	0.185	0.1881	0.1912	0.4494	0.2643	0.2638	0	0	0	0	0	0	0.1921	0.1347	0.1573	0.0251	0.0252	0.02515
000629-94-7	0	0	0	0.0483	0.5787	0.3135	0	0	0	0	0	0	0	0	0	0	0	0	0	0	0	0	0	0	0	0	0
013877-91-3	0	0	0	0	0	0	0	0	0	0	0	0	0.0335	0.0264	0.02995	0	0	0	0	0	0	0	0	0	0	0	0
997062-33-7	0	0	0	0	0	0	0	0	0	0	0	0	0.0229	0.0364	0.02965	0	0	0	0	0	0	0	0	0	0	0	0
017627-44-0	0	0	0	0	0	0	0	0	0	0	0	0	0	0	0	0.16695	0.1702	0.1637	0.15755	0.1567	0.1584	0.1699	0.1424	0.149	0	0	0
021747-46-6	0	0	0	0	0	0	0.3799	0.3045	0.3422	0	0	0	0	0	0	0	0	0	0	0	0	0	0	0	0	0	0
997839-76-2	0	0	0	0.14195	0.1969	0.087	0	0	0	0	0	0	0	0	0	0	0	0	0	0	0	0	0	0	0	0	0
038049-26-2	0	0	0	0	0	0	0	0	0	0	0	0	0.78845	0.794	0.7829	0.8544	0.858	0.8297	0	0	0	0	0	0	0	0	0
092356-06-4	0	0	0	0	0	0	0	0	0	0	0	0	0	0	0	0	0	0	0	0	0	0	0	0	0.1271	0.1303	0.1239
028634-89-1	0	0	0	0	0	0	0.3306	0.3309	0.3301	0	0	0	0	0	0	0	0	0	0	0	0	0.3589	0.36605	0.3732	0	0	0
000106-72-9	0	0	0	0	0	0	0.0686	0.0639	0.0647	0.0367	0.0503	0.0452	0	0	0	0.0662	0.0624	0.0572	0.0289	0.03	0.0328	0.0528	0.0454	0.1926	0.0664	0.0584	0.0567
055334-43-5	0	0	0	0	0	0	0.0811	0.0706	0.07585	0	0	0	0	0	0	0	0	0	0	0	0	0	0	0	0	0	0
997107-76-7	0	0	0	0	0	0	0.103	0.0857	0.09435	0	0	0	0	0	0	0	0	0	0	0	0	0	0	0	0	0	0
000120-58-1	0	0	0	0	0	0	0.0388	0.0373	0.0425	0	0	0	0	0	0	0	0	0	0	0	0	0	0	0	0	0	0
003856-25-5	0	0	0	0	0	0	0.0519	0.0612	0.0844	0.051	0.0491	0.0416	0.0406	0.0848	0.063	0.0415	0.0493	0.0508	0.0457	0.0415	0.0413	0.0694	0.0646	0.0604	0.0516	0.0487	0.0501
031983-22-9	0	0	0	0	0	0	2.8597	2.9232	2.9292	0	0	0	0	0	0	0	0	0	0	0	0	0	0	0	0	0	0
108078-47-3	0	0	0	0	0	0	0.0784	0.0856	0.0906	0	0	0	0	0	0	0	0	0	0	0	0	0	0	0	0	0	0
015826-82-1	0	0	0	0	0	0	0.03055	0.0489	0.0122	0	0	0	0	0	0	0	0	0	0	0	0	0	0	0	0	0	0
004057-31-2	0	0	0	0	0	0	0.0388	0.0379	0.0397	0	0	0	0.0353	0.033	0.0329	0	0	0	0	0	0	0	0	0	0	0	0
043219-80-3	0	0	0	0	0	0	0.828	0.8312	0.8248	0	0	0	0	0	0	0	0	0	0	0	0	0	0	0	0	0	0
997221-22-5	0	0	0	0	0	0	0.83975	0.8223	0.8572	0.8242	0.8859	0.85505	0.8511	0.8074	0.8169	0.871	0.8941	0.8713	0.9097	0.8604	0.8583	0.8878	0.8028	0.7749	0.9182	0.9324	0.9004
997083-73-0	0	0	0	0	0	0	0	0	0	0	0	0	0	0	0	0	0	0	0	0	0	0.4204	0.4058	0.435	0	0	0
000536-60-7	0	0	0	0	0	0	0	0	0	0	0	0	0.0742	0.0753	0.0764	0.0718	0.0697	0.0681	0	0	0	0	0	0	0	0	0
031145-21-8	0	0	0	0	0	0	0	0	0	0.1017	0.1063	0.104	0	0	0	0.10535	0.108	0.1027	0.0999	0.1005	0.0993	0.1074	0.10055	0.0937	0.1143	0.1125	0.1089
000088-84-6	0	0	0	0	0	0	0	0	0	0.2188	0.0712	0.2487	0.0568	0.2185	0.13765	0	0	0	0	0	0	0	0	0	0	0	0
072203-99-7	0	0	0	0	0	0	0	0	0	0	0	0	0.1561	0.1227	0.1252	0	0	0	0.1438	0.148	0.1396	0	0	0	0.1618	0.15685	0.1519
016409-43-1	0	0	0	0	0	0	0	0	0	0	0	0	0	0	0	0.0152	0.013	0.0325	0	0	0	0	0	0	0	0	0
029803-82-5	0	0	0	0	0	0	0	0	0	0	0	0	0.0335	0.03455	0.0356	0.0297	0.0279	0.0198	0.0258	0.0276	0.0267	0.0319	0.2182	0.3427	0.0251	0.0235	0.022
997058-86-0	0	0	0	0	0	0	0	0	0	0.0544	0.0605	0.05745	0	0	0	0.0654	0.064	0.0647	0	0	0	0	0	0	0	0	0
029803-81-4	0	0	0	0	0	0	0	0	0	0	0	0	0	0	0	0.0373	0.0354	0.0306	0.0291	0.0336	0.0243	0.037	0.189	0.2458	0.0332	0.0312	0.03
001197-01-9	0	0	0	0	0	0	0	0	0	0.0768	0.06585	0.0549	0	0	0	0	0	0	0	0	0	0	0	0	0	0	0
000112-31-2	0	0	0	0	0	0	0	0	0	0.0352	0.0234	0.0116	0	0	0	0.0382	0.0344	0.0328	0.0371	0.0434	0.0111	0.0438	0.1439	0.185	0.0291	0.026	0.0271
092618-89-8	0	0	0	0	0	0	0	0	0	0	0	0	0	0	0	0.0338	0.0341	0.0306	0.0295	0.0338	0.0252	0.03735	0.0317	0.0443	0.0327	0.033	0.0303
000094-59-7	0	0	0	0	0	0	0	0	0	0.0467	0.0681	0.0405	0.0385	0.0333	0.0359	0.0348	0.0333	0.03405	0.0395	0.0438	0.0295	0.0443	0.0315	0.0353	0.0324	0.0317	0.0296
014912-44-8	0	0	0	0	0	0	0	0	0	0.0426	0.2247	0.13365	0	0	0	0	0	0	0	0	0	0.2486	0.2249	0.2125	0.2425	0.2432	0.2439
000141-14-0	0	0	0	0	0	0	0	0	0	1.0314	0.92855	0.8257	0	0	0	0	0	0	1.1045	0.967	0.8354	0	0	0	0	0	0
072747-25-2	0	0	0	0	0	0	0	0	0	0.04	0.05255	0.0651	0	0	0	0	0	0	0	0	0	0	0	0	0	0	0
025905-14-0	0	0	0	0	0	0	0	0	0	0.7585	0.75335	0.7482	0	0	0	0	0	0	0	0	0	0	0	0	0	0	0
060909-28-6	0	0	0	0	0	0	0	0	0	0.0949	0.0967	0.0882	0	0	0	0.0884	0.086	0.0842	0.08195	0.0799	0.084	0	0	0	0	0	0
000473-13-2	0	0	0	0	0	0	0	0	0	0	0	0	0	0	0	0	0	0	0	0	0	4.69325	4.8377	4.5488	0	0	0
000483-75-0	0	0	0	0	0	0	0	0	0	0	0	0	84.441	2.8676	2.8819	3.017	3.0653	3.04115	0	0	0	0	0	0	0	0	0
997220-96-6	0	0	0	0	0	0	0	0	0	0.888	0.92315	0.9583	0	0	0	0.0438	1.0846	1.0492	1.1369	1.0353	1.1043	0.5035	0.0357	0.9713	0	0	0
997221-05-4	0	0	0	0	0	0	0	0	0	0.3842	0.4299	0.3993	0	0	0	0	0	0	0	0	0	0	0	0	0	0	0
000560-32-7	0	0	0	0	0	0	0	0	0	0.123	0.1329	0.1428	0	0	0	0	0	0	0	0	0	0	0	0	0	0	0
090165-09-6	0	0	0	0	0	0	0	0	0	0.0901	0.1068	0.09845	0	0	0	0	0	0	0	0	0	0.1002	0.092	0.0835	0	0	0
997081-35-8	0	0	0	0	0	0	0	0	0	0.01815	0.0232	0.0131	0	0	0	0	0	0	0	0	0	0	0	0	0	0	0
021290-09-5	0	0	0	0	0	0	0	0	0	0.2903	0.3904	0.1902	0	0	0	0	0	0	0	0	0	0	0	0	0	0	0
005989-08-2	0	0	0	0	0	0	0	0	0	0	0	0	0	0	0	0.04025	0.0401	0.0404	0	0	0	0.0394	0.03605	0.0327	0	0	0
000105-87-3	0	0	0	0	0	0	0	0	0	0	0	0	0	0	0	0.7764	0.7712	0.766	0	0	0	0.71805	0.7422	0.6939	0	0	0
013474-59-4	0	0	0	0	0	0	0	0	0	0.05465	0.0568	0.0525	0	0	0	0.0536	0.05195	0.0503	0.0584	0.0519	0.0519	0.0556	0.0505	0.0476	0.0591	0.0565	0.0559
997221-32-3	0	0	0	0	0	0	0	0	0	0	0	0	0	0	0	0.3654	0.3579	0.3504	0	0	0	0	0	0	0.3866	0.3724	0.3582
024703-35-3	0	0	0	0	0	0	0	0	0	0	0	0	0	0	0	0	0	0	0	0	0	0.1296	0.1246	0.1346	0	0	0
005937-11-1	0	0	0	0	0	0	0	0	0	0	0	0	0	0	0	0.1593	0.1425	0.1415	0.1668	0.1678	0.154	0	0	0	0.1654	0.1586	0.1518
997110-45-4	0	0	0	0	0	0	0	0	0	0	0	0	0	0	0	0	0	0	0.0335	0.0278	0.03065	0	0	0	0	0	0
000076-22-2	0	0	0	0	0	0	0	0	0	0	0	0	0	0	0	0	0	0	0.8082	0.8199	0.7585	0	0	0	0	0	0
001197-06-4	0	0	0	0	0	0	0	0	0	0	0	0	0	0	0	0	0	0	0.0234	0.0201	0.02175	0	0	0	0	0	0
089128-12-1	0	0	0	0	0	0	0	0	0	0	0	0	0	0	0	0.0944	0.1029	0.0963	0.1113	0.1024	0.10685	0	0	0	0	0	0
096555-02-1	0	0	0	0	0	0	0	0	0	0	0	0	0	0	0	0.0292	0.0324	0.026	0	0	0	0.0429	0.1589	0.2193	0.0301	0.029	0.0268
000105-85-1	0	0	0	0	0	0	0	0	0	0	0	0	0	0	0	0	0	0	0.0375	0.0482	0.0383	0.0691	0.054	0.0978	0.0459	0.0468	0.0455
000124-76-5	0	0	0	0	0	0	0	0	0	0	0	0	0	0	0	0.2137	0.20885	0.204	0	0	0	0	0	0	0	0	0
061142-33-4	0	0	0	0	0	0	0	0	0	0	0	0	0	0	0	0.1258	0.1228	0.1243	0	0	0	0	0	0	0	0	0
000491-04-3	0	0	0	0	0	0	0	0	0	0	0	0	0	0	0	0.0304	0.0303	0.03035	0	0	0	0	0	0	0.02525	0.0261	0.0244
001117-61-9	0	0	0	0	0	0	0	0	0	0	0	0	0	0	0	0	0	0	0	0	0	0.035	0.0978	0.0664	0	0	0
062108-28-5	0	0	0	0	0	0	0	0	0	0	0	0	0	0	0	0.053	0.0508	0.0519	0	0	0	0	0	0	0	0	0
007094-26-0	0	0	0	0	0	0	0	0	0	0	0	0	0	0	0	0.048	0.0452	0.0508	0	0	0	0	0	0	0.0429	0.04185	0.0408
000465-31-6	0	0	0	0	0	0	0	0	0	0	0	0	0	0	0	0	0	0	0.0343	0.0372	0.0313	0	0	0	0.0329	0.0329	0.0325
997050-84-9	0	0	0	0	0	0	0	0	0	0	0	0	0	0	0	0.0422	0.0402	0.0442	0	0	0	0	0	0	0	0	0
001209-71-8	0	0	0	0	0	0	0	0	0	0	0	0	0	0	0	0.04885	0.0513	0.0464	0.0727	0.0539	0.0633	0	0	0	0.0507	0.05455	0.0584
997383-14-2	0	0	0	0	0	0	0	0	0	0	0	0	0	0	0	0.03665	0.038	0.0353	0	0	0	0	0	0	0	0	0
108287-10-1	0	0	0	0	0	0	0	0	0	0	0	0	0	0	0	0	0	0	0	0	0	0	0	0	0.0367	0.0409	0.0451
997230-50-5	0	0	0	0	0	0	0	0	0	0	0	0	0	0	0	0	0	0	0.0207	0.0177	0.0237	0	0	0	0.0251	0.02635	0.0276
000546-79-2	0	0	0	0	0	0	0	0	0	0	0	0	0	0	0	0	0	0	0	0	0	0.0131	0.0145	0.1532	0.0121	0.0113	0.0103
997083-23-8	0	0	0	0	0	0	0	0	0	0	0	0	0	0	0	0	0	0	0	0	0	0.2484	0.374	0.3112	0	0	0
001518-86-1	0	0	0	0	0	0	0	0	0	0	0	0	0	0	0	0	0	0	0	0	0	0	0	0	0.0303	0.02455	0.0188
018383-59-0	0	0	0	0	0	0	0	0	0	0	0	0	0	0	0	0	0	0	0.0129	0.0136	0.01325	0	0	0	0	0	0
997071-34-9	0	0	0	0	0	0	0	0	0	0	0	0	0	0	0	0	0	0	0.0593	0.0673	0.0507	0	0	0	0	0	0
067650-90-2	0	0	0	0	0	0	0	0	0	0	0	0	0	0	0	0	0	0	0.0356	0.0349	0.03525	0	0	0	0.0408	0.04115	0.0415
068705-63-5	0	0	0	0	0	0	0	0	0	0	0	0	0	0	0	0	0	0	0.8075	0.8014	0.80445	0	0	0	0	0	0
000119-47-1	0	0	0	0	0	0	0	0	0	0	0	0	0	0	0	0	0	0	0.0164	0.0254	0.0322	0.0212	0.0268	0.0236	0.0324	0.0336	0.0277
007212-44-4	0	0	0	0	0	0	0	0	0	0	0	0	0	0	0	0	0	0	0	0	0	0	0	0	0.4573	0.465	0.4378
000105-86-2	0	0	0	0	0	0	0	0	0	0	0	0	0	0	0	0	0	0	0	0	0	0.05545	0.0569	0.054	0.0191	0.0207	0.0151
443124-67-2	0	0	0	0	0	0	0	0	0	0	0	0	0	0	0	0	0	0	0	0	0	0	0	0	0.1104	0.1633	0.13685
000473-16-5	0	0	0	0	0	0	0	0	0	0	0	0	0	0	0	0	0	0	0	0	0	0.06	0.0539	0.0502	0	0	0
000107-41-5	0	0	0	0	0	0	0	0	0	0	0	0	0	0	0	0	0	0	0	0	0	0.0094	0.0087	0.0101	0	0	0
018383-58-9	0	0	0	0	0	0	0	0	0	0	0	0	0	0	0	0	0	0	0	0	0	0.11805	0.0797	0.1564	0	0	0
015358-88-0	0	0	0	0	0	0	0	0	0	0	0	0	0	0	0	0	0	0	0	0	0	0.09745	0.0918	0.1031	0	0	0
000638-66-4	0	0	0	0	0	0	0	0	0	0	0	0	0	0	0	0	0	0	0	0	0	0.0244	0.0256	0.0232	0	0	0
000089-79-2	0	0	0	0	0	0	0	0	0	0	0	0	0	0	0	0	0	0	0	0	0	0	0	0	0.1995	0.8088	0.50415
016996-12-6	0	0	0	0	0	0	0	0	0	0	0	0	0	0	0	0	0	0	0	0	0	0	0	0	0.0423	0.03795	0.0336
071962-31-7	0	0	0	0	0	0	0	0	0	0	0	0	0	0	0	0	0	0	0	0	0	0	0	0	0.0875	0.08345	0.0794
997275-63-4	0	0	0	0	0	0	0	0	0	0	0	0	0	0	0	0	0	0	0	0	0	0	0	0	0.0236	0.0215	0.02255
997519-15-7	0	0	0	0	0	0	0	0	0	0	0	0	0	0	0	0	0	0	0	0	0	0	0	0	0.0503	0.0483	0.0463
997221-76-7	0	0	0	0	0	0	0	0	0	0	0	0	0	0	0	0	0	0	0	0	0	0	0	0	0.0544	0.0683	0.0403
061447-89-0	0	0	0	0	0	0	0	0	0	0	0	0	0	0	0	0	0	0	0	0	0	0	0	0	0.0768	0.1033	0.0901
006639-57-2	0	0	0	0	0	0	0	0	0	0	0	0	0	0	0	0	0	0	0	0	0	0	0	0	0.0467	0.0606	0.05365
997405-67-0	0	0	0	0	0	0	0	0	0	0	0	0	0	0	0	0	0	0	0	0	0	0	0	0	0.0718	0.0639	0.0797
997513-29-4	0	0	0	0	0	0	0	0	0	0	0	0	0	0	0	0	0	0	0	0	0	0	0	0	0.0337	0.022	0.0454
002387-78-2	0	0	0	0	0	0	0	0	0	0	0	0	0.1533	0.1569	0.1497	0	0	0	0	0	0	0	0	0	0	0	0
034690-52-3	0	0	0	0	0	0	0	0	0	0	0	0	0.01575	0.015	0.0165	0	0	0	0	0	0	0	0	0	0	0	0
997114-78-6	0	0	0	0	0	0	0	0	0	0	0	0	0.0378	0.0357	0.0399	0	0	0	0	0	0	0	0	0	0	0	0
001193-18-6	0	0	0	0	0	0	0	0	0	0	0	0	0.0736	0.07075	0.0679	0	0	0	0	0	0	0	0	0	0	0	0
997555-28-7	0	0	0	0	0	0	0	0	0	0	0	0	0.0496	0.0498	0.05	0	0	0	0	0	0	0	0	0	0	0	0
